# Supplementary material for: Dub3 inhibition suppresses breast cancer invasion and metastasis by promoting Snail1 degradation
Source: PubMed Central journal article supplement (PMC5316870; doi:10.1038/ncomms14228), 2017-02-15

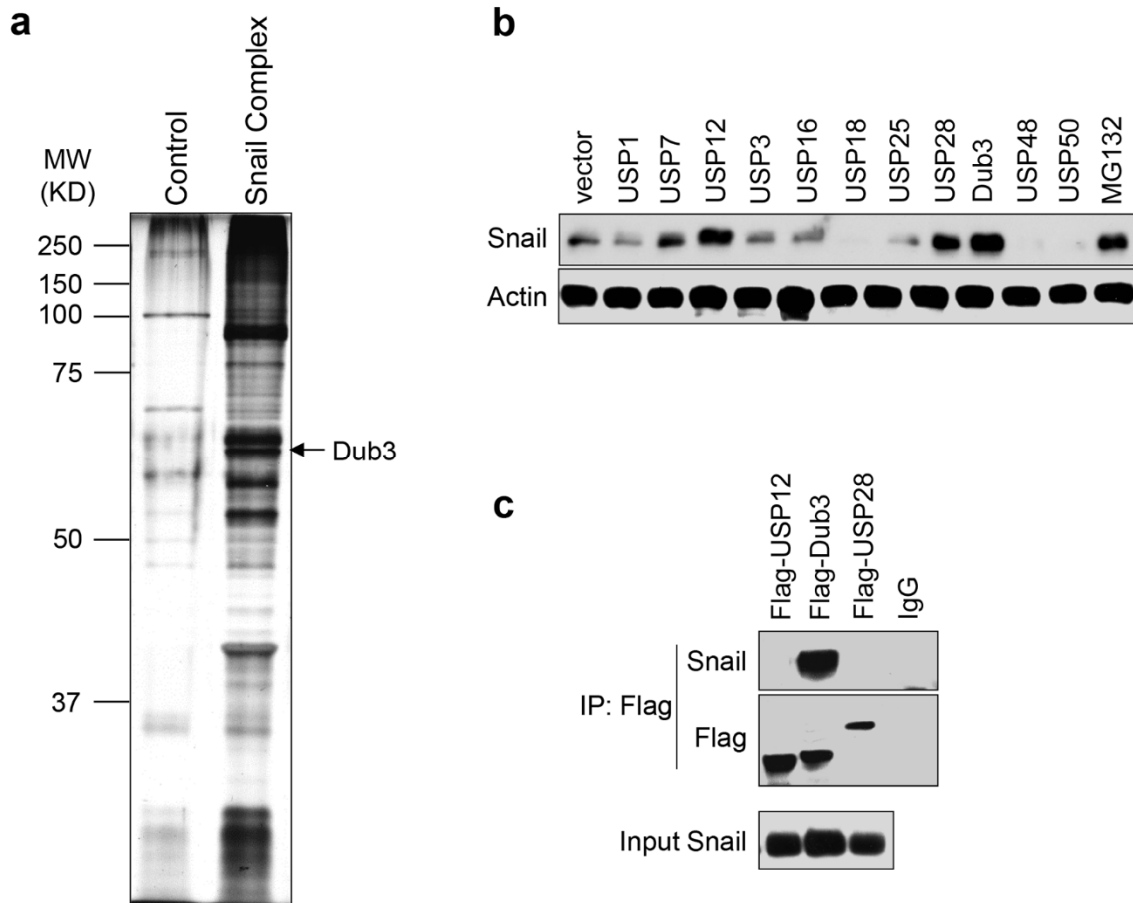

### Supplementary Figure 1 | Dub3 stabilizes Snail1.

- (a)** The Snail1 complex was isolated by immunoprecipitation, separated on SDS-PAGE and visualized by silver staining. A protein with molecular weight close to 65 kDa was excised and identified as Dub3 by mass spectrometry.
- (b)** Flag-Snail1 and indicated DUBs were co-expressed in HEK293 cells for 48 hr. Flag-Snail1 was also expressed in HEK293 cells for 42 hr followed by treatment with 10  $\mu$ M MG132 for 6 hr. The protein level of Snail1 was analyzed by western blot with Flag antibody.
- (c)** HA-tagged Snail1 and Flag-tagged DUBs were co-expressed in HEK293 cells. After immunoprecipitation, bound Snail1 was examined by western blot.

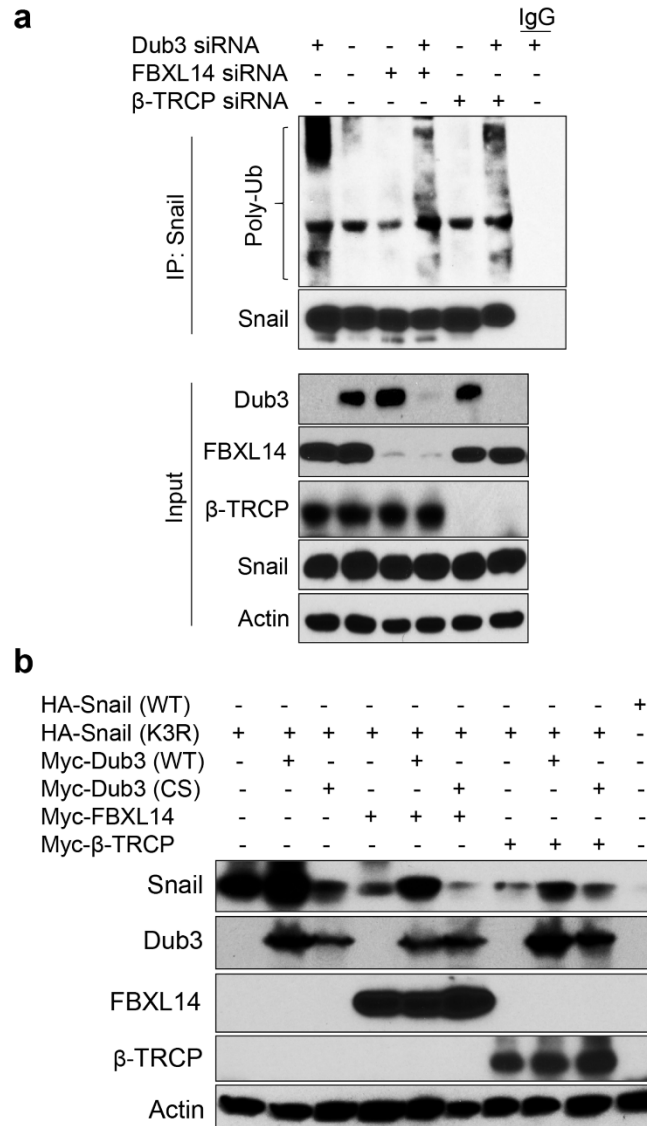

**Supplementary Figure 2 | Dub3 deubiquitinates Snail1 and antagonizes the function of Snail1's E3 ligase.**

- (a) MDA-MB231 cells were transfected with siDub3, si $\beta$ -TRCP1 or SiFBXL14 alone or in combination. After 42 hr of post-transfection, cells were treated with MG132 for 6 hr and harvested for ubiquitination assessment.
- (b) HEK293 cells were transfected with indicated set of expression plasmids, and cell lysates were analyzed for the expression of Snail1, Dub3,  $\beta$ -TRCP1 and FBXL14 by western blot.

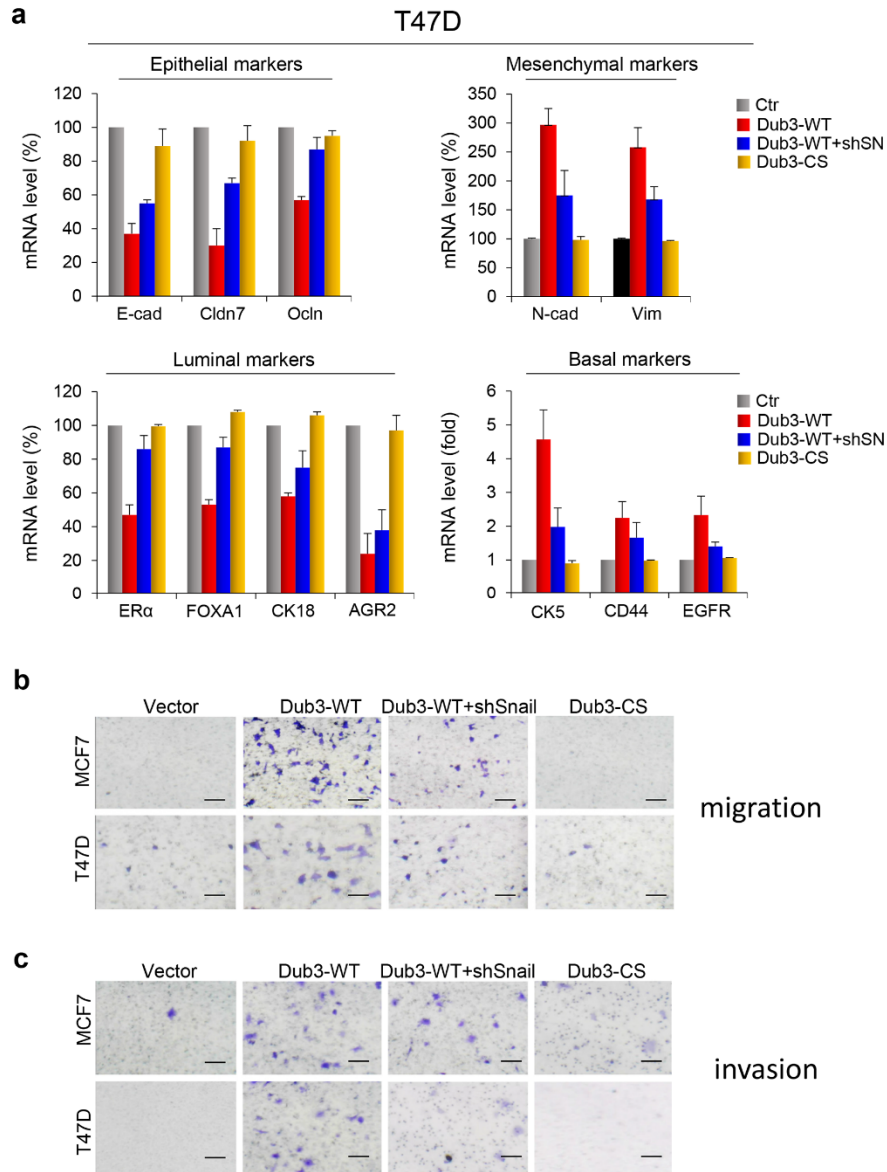

**Supplementary Figure 3 | Overexpression of Dub3 induces EMT.**

- (a) WT- or CS-Dub3 was expressed in T47D cells. A rescue experiment with knockdown of Snail1 expression in WT-Dub3 expressing cells was also performed. The mRNA levels of epithelial, mesenchymal, luminal, and basal markers were quantitated by real-time PCR. Data are shown as mean  $\pm$  SD of two separate experiments in triplicates.
- (b) Representative images of Boyden chamber migration assay of modified MCF7 and T47D cells, as described in (a). Scale bar = 200  $\mu$ m
- (c) Representative images of Boyden chamber invasion assay of modified MCF7 and T47D cells, as described in (a). Scale bar = 200  $\mu$ m

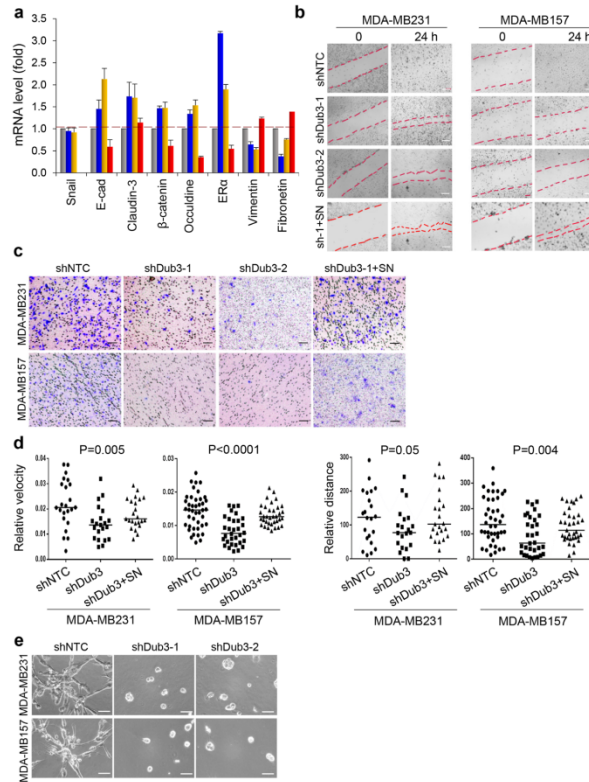

**Supplementary Figure 4 | Knockdown of Dub3 inhibits migration, invasion in BLBC cells by downregulation of Snail1.**

- (a) Real-time PCR analysis of the mRNA level of several EMT markers in MDA-MB231 cells. Data are shown as mean  $\pm$  SD of two separate experiments in triplicates.
- (b) The migratory ability of MDA-MB231 and MDA-MB157 cells and the corresponding stable transfectants with knockdown of Dub3 expression or Snail1 rescued expression in Dub3 knockdown cells were analyzed by wound healing assay. A representative experiment is shown. Scale bar = 200  $\mu$ m.
- (c) The invasiveness of MDA-MB231 and MDA-MB157 cells stably expressed control vector, Dub3 shRNA or Snail1 rescued expression in Dub3-knockdown cells was analyzed with a modified Boyden chamber invasion assay. A representative experiment is shown. Scale bar = 200  $\mu$ m.
- (d) A total of 30 cells were scored for distance and velocity and shown graphically. Each point represents the track of one individual cell, and the bar displays the median value.  $***P > 0.005$  as determined by one-way analysis of variance.
- (e) 3D morphology of MDA-MB231 and MDA-MB157 cells expressed control vector or Dub3 shRNA. Scale bar = 500  $\mu$ m.

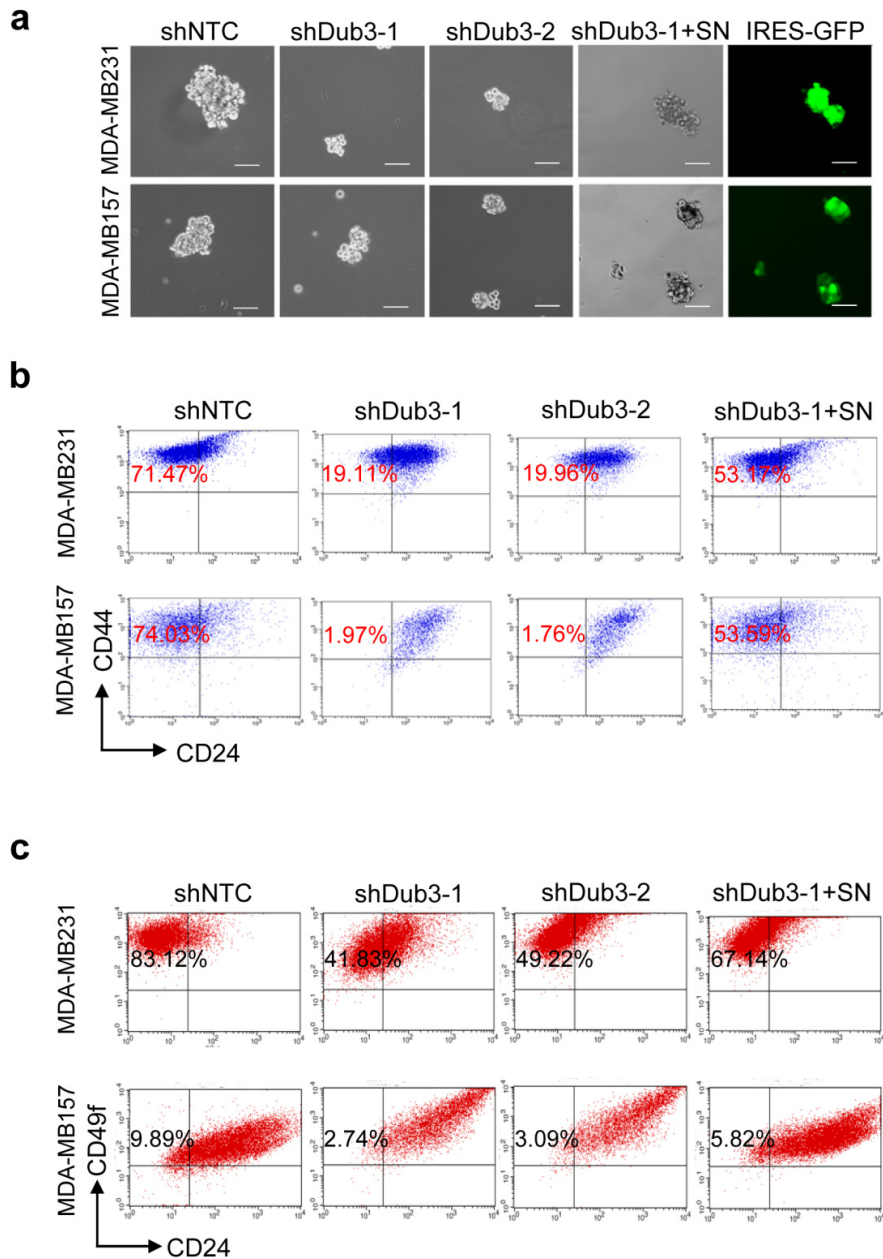

**Supplementary Figure 5 | Knockdown of Dub3 inhibits CSC-like characteristics in BLBC cells by downregulation of Snail1.**

- (a) Representative images of tumorsphere-formation from MDA-MB231 and MDA-MB157 cells stably expressed control vector, Dub3 shRNA or Snail1 rescued expression in Dub3-knockdown cells. Scale bar = 200  $\mu$ m.
- (b) Representative images of the CD44<sup>high</sup>/CD24<sup>low</sup> population sorted from cells described in (a).
- (c) Representative images of the CD49f<sup>high</sup>/CD24<sup>low</sup> population sorted from sorted from cells described in (a).

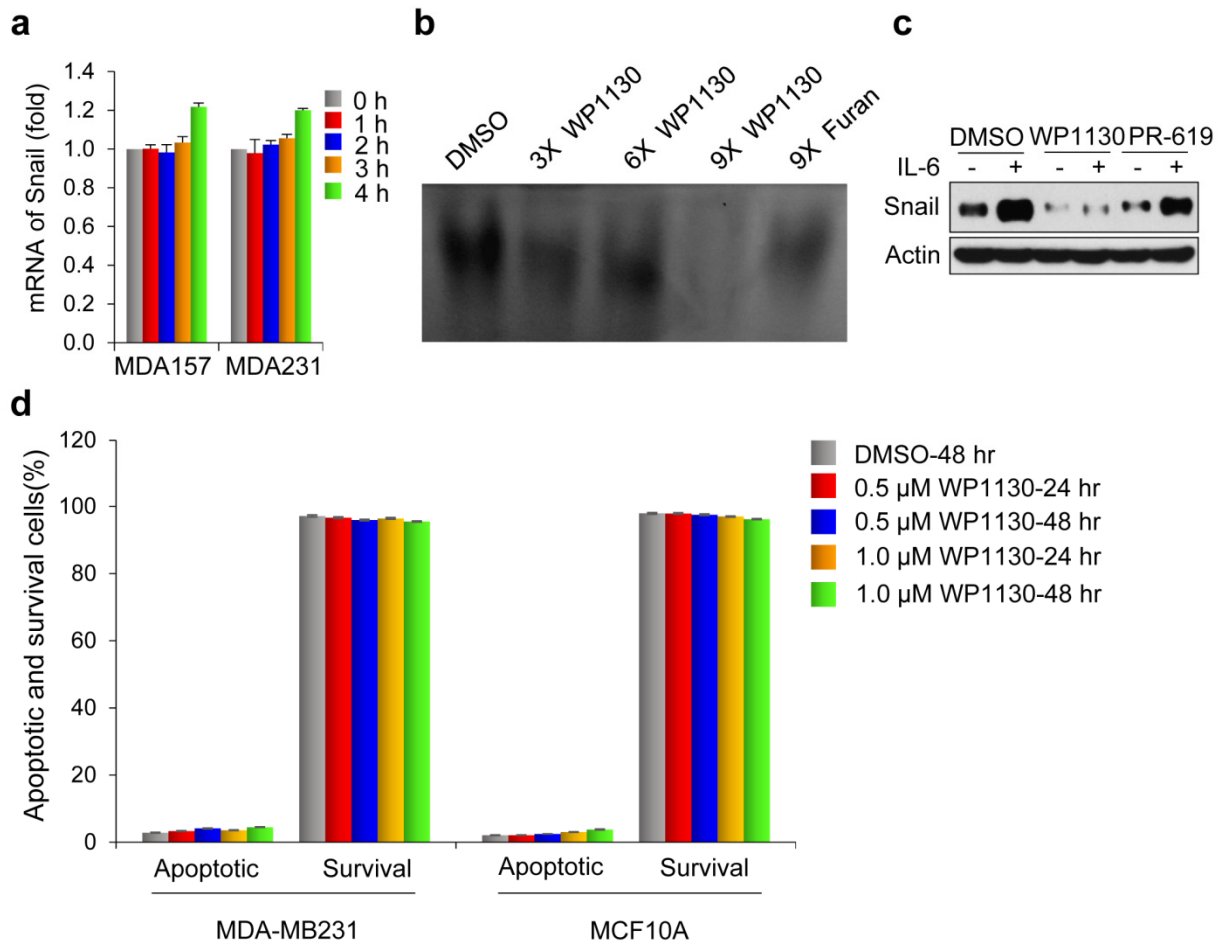

### Supplementary Figure 6 | WP1130 is an inhibitor of Dub3.

- (a) Real-time PCR analysis of Snail1 mRNA in MDA-MB231 and MDA-MB157 cells after IL-6 treatment with different time intervals. Data are shown as mean  $\pm$  SD of two separate experiments in triplicates.
- (b) Interaction of WP1130 with purified recombinant Dub3 shifted the apoenzyme of Dub3 (DMSO), whereas Furan did not have this effect. This interaction appears to be dose-dependent and cause protein destabilization or degradation (especially in lane 4).
- (c) MDA-MB231 cells were serum starved for 24 hr and then treated with WP1130 or PR619 for half hour followed by IL-6 treatment for 2 hr. The cell lysate was analyzed with western blot.
- (d) Immortalized normal human breast epithelial cells (MCF10A) and MDA-MB231 cells were treated with different doses of WP1130 (0.5 and 1  $\mu$ M) for different time intervals (24 and 48 hrs). The apoptotic and survival cells were analyzed by FACS. Data are shown as mean  $\pm$  SD of two separate experiments in triplicates.

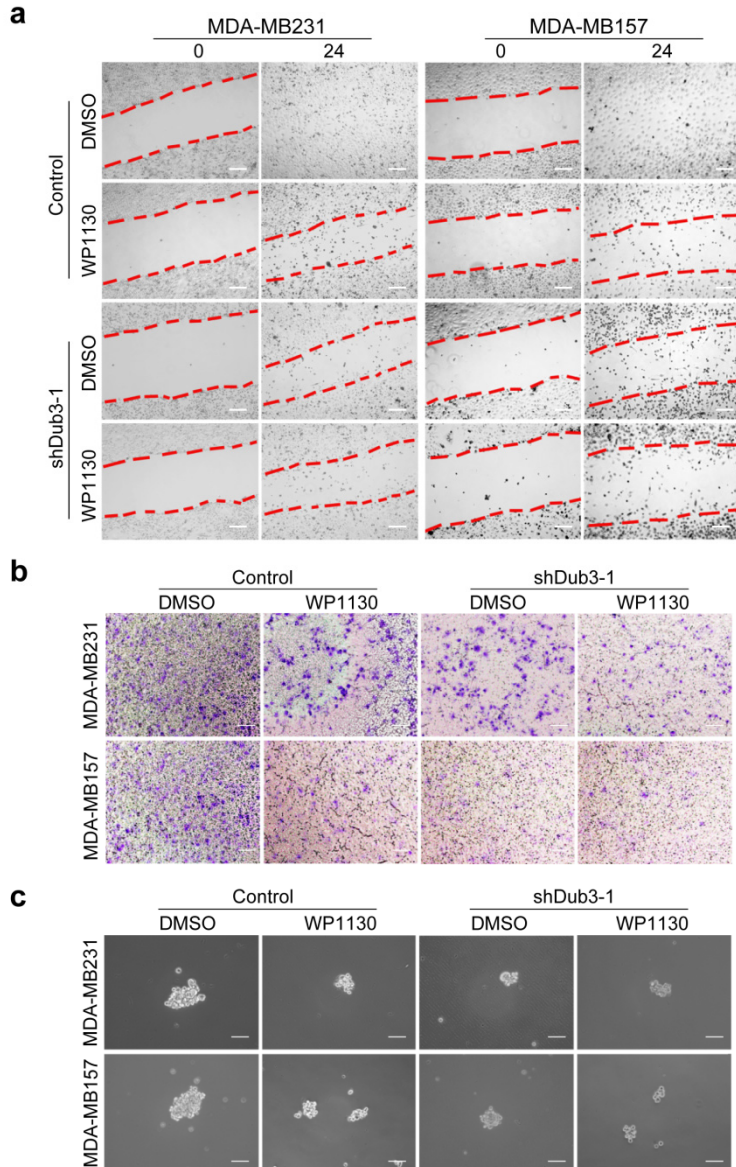

**Supplementary Figure 7 | WP1130 inhibits Dub3 activity.**

- (a) MDA-MB231 and MDA-MB157 cells stably expressing control vector or Dub3 shRNA were treated with 0.5  $\mu$ M WP1130 for 24 hr and analyzed for cell migration using wound healing assay. Representative images are shown. Scale bar = 200  $\mu$ m.
- (b) Cells as in (a) were treated with 0.5  $\mu$ M WP1130 for 4 hr and analyzed for cell invasion. Representative images are shown. Scale bar = 200  $\mu$ m.
- (c) Cells as in (a) were treated with 0.5  $\mu$ M WP1130 and analyzed for tumorsphere-formation. Representative images are shown. Scale bar = 200  $\mu$ m.

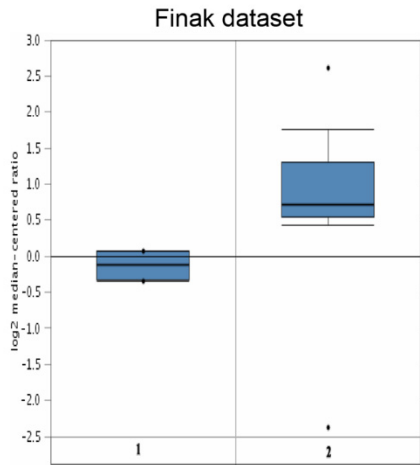

1. Breast
2. Invasive ductal breast carcinoma

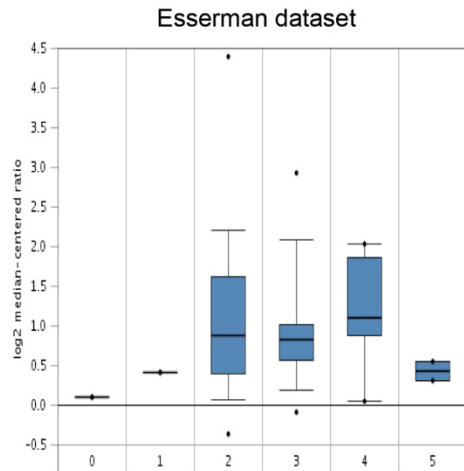

0. Breast
1. Breast Carcinoma
2. Ductal Breast Carcinoma
3. Invasive Breast Carcinoma
4. Lobular Breast Carcinoma
5. Mixed Lobular and Ductal Breast Carcinoma

**Supplementary Figure 8 | Expression of Dub3 and Snail1 are positively correlated in breast cancer patients.**

Based on gene expression profiles (datasets from Finak and Esserman in Oncomine), high level of Dub3 mRNA was found in the invasive ductal breast carcinoma compared to normal breast tissues.



**Supplementary Figure 9 | Full scans of the most important blots.**

**Figure 1a**

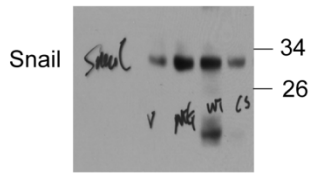

**Figure 2e**

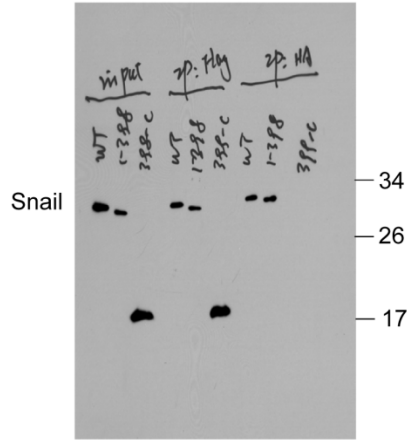

**Figure 1b**

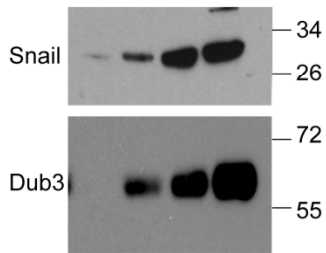

**Figure 1d**

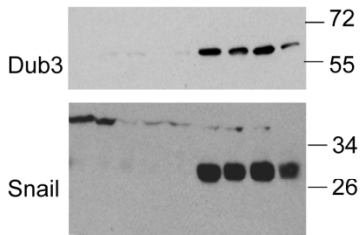

**Figure 2g**

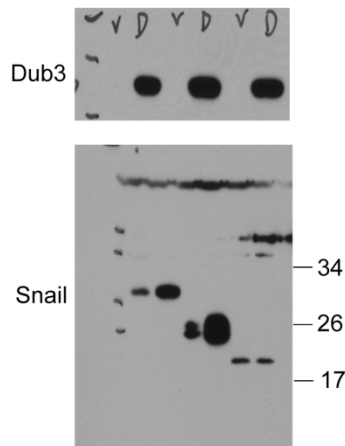

**Figure 1g**

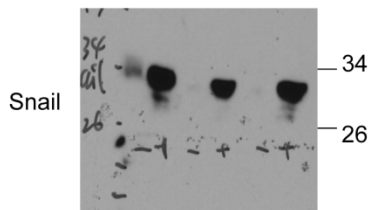

**Figure 3a**

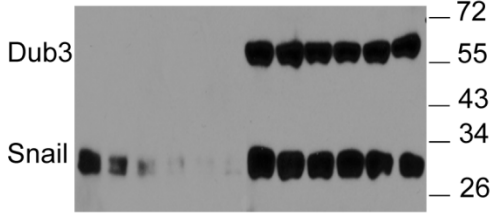

**Figure 3d**

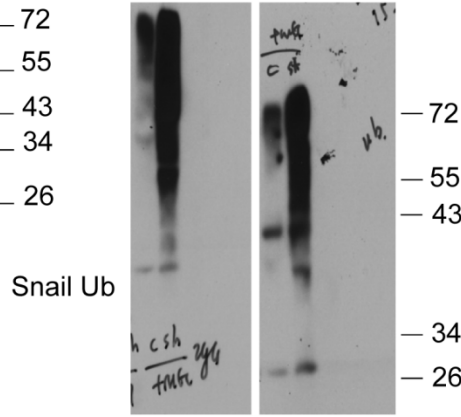

**Figure 3g**

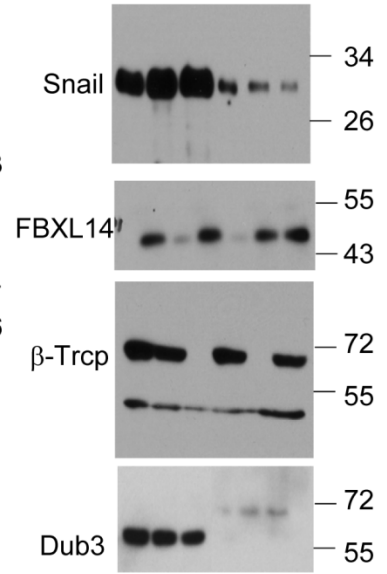

**Figure 3b**

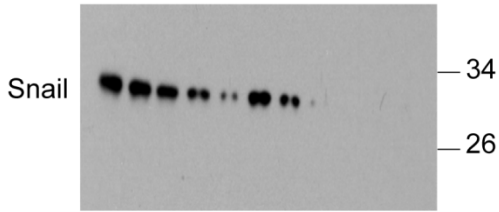

**Figure 3e**

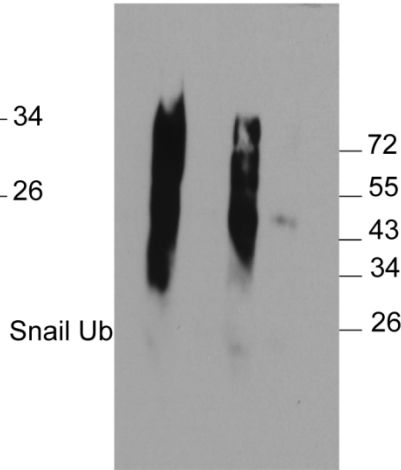

**Figure 3h**

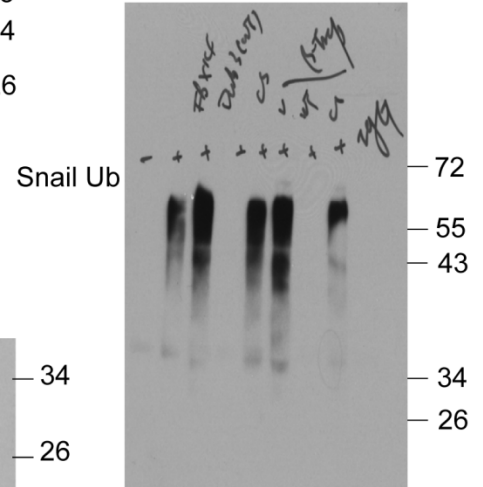

**Figure 3c**

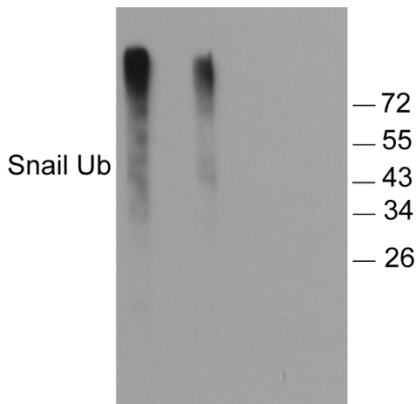

**Figure 3f**

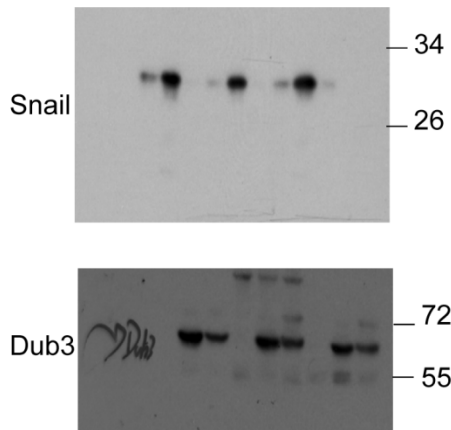

**Figure 4a**

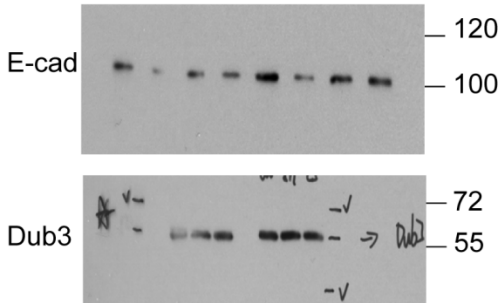

**Figure 6e**

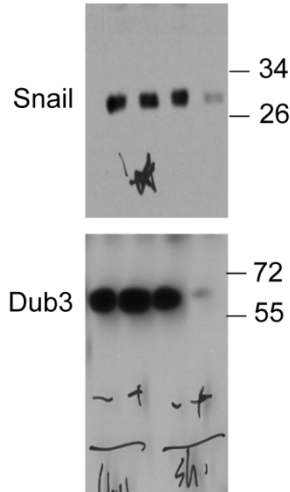

**Figure 7a**

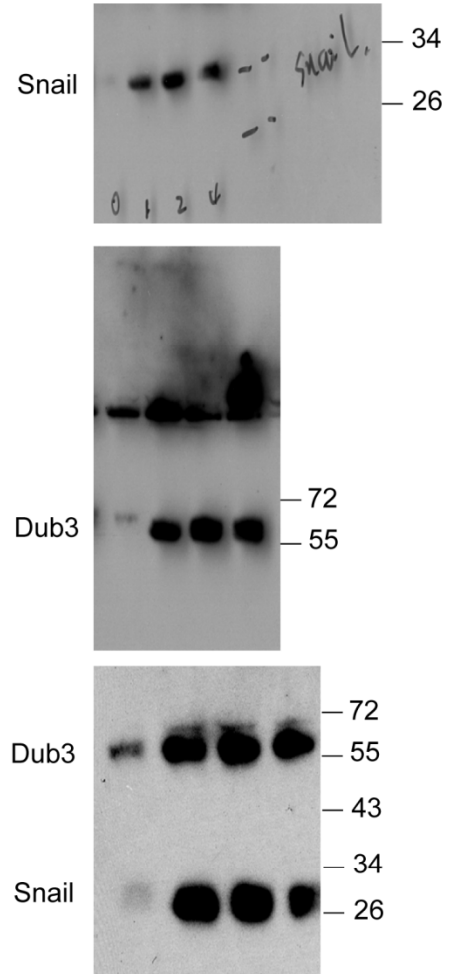

**Figure 5a**

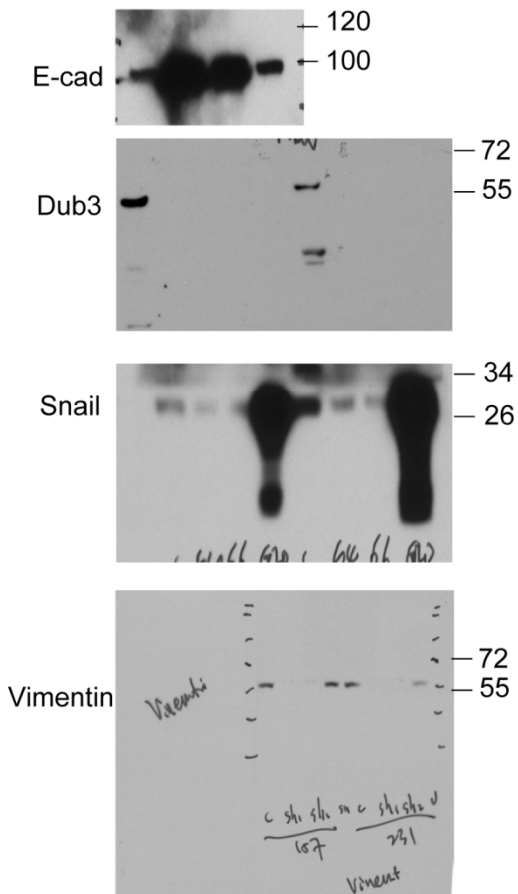

**Figure 7b**

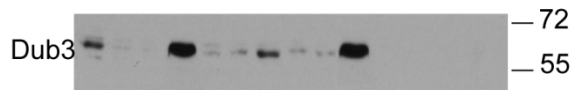

Supplement: ncomms14228-s1.pdf [file ncomms14228-s1.pdf]
